# Supplementary material
Source: PubMed Central journal article supplement (PMC4986328)
Supplement: supp_ddw043_ddw043supp_table1.pdf [file supp_ddw043_ddw043supp_table1.pdf]

**Table S1: List of aborted fetal brain tissue used in this study**

| Case No. | Gestational Age | Karyotype   | Gender | Postmortem Interval |
|----------|-----------------|-------------|--------|---------------------|
| 1        | 14 weeks        | 46, XY      | Male   | 4 hours             |
| 2        | 14 weeks        | 47, XY, +13 | Male   | 4 hours             |
| 3        | 14 weeks        | 47, XY, +18 | Male   | 4 hours             |
| 4        | 14 weeks        | 47, XY, +21 | Male   | 3 hours             |
| 5        | 18 weeks        | 46, XY      | Male   | 4 hours             |
| 6        | 18 weeks        | 46, XY      | Male   | 3 hours             |
| 7        | 18 weeks        | 46, XY      | Male   | 4 hours             |
| 8        | 18 weeks        | 46, XY      | Male   | 3 hours             |
| 9        | 18 weeks        | 46, XY      | Male   | 4hours              |
| 10       | 18 weeks        | 47, XY, +21 | Male   | 4 hours             |
| 11       | 18 weeks        | 47, XY, +21 | Male   | 4 hours             |
| 12       | 18 weeks        | 47, XY, +21 | Male   | 3 hours             |
| 13       | 18 weeks        | 47, XY, +21 | Male   | 4 hours             |
| 14       | 18 weeks        | 47, XY, +21 | Male   | 3 hours             |
| 15       | 21 weeks        | 46, XY      | Male   | 4 hours             |
| 16       | 21 weeks        | 46, XY      | Male   | 2 hours             |
| 17       | 21 weeks        | 46, XY      | Male   | 3 hours             |
| 18       | 21 weeks        | 47, XY, +21 | Male   | 4 hours             |
| 19       | 21 weeks        | 47, XY, +21 | Male   | 3 hours             |

---

|    |                                  |             |        |          |
|----|----------------------------------|-------------|--------|----------|
| 20 | 21 weeks                         | 47, XY, +21 | Male   | 3 hours  |
| 21 | Newborn 125 days<br>(UMB# 390)   | 46, XX      | Female | 18 hours |
| 22 | Newborn 148 days<br>(UMB#M1974M) | 47, XX, +21 | Female | 24 hours |

---
