# Supplementary material
Source: PubMed Central journal article supplement (PMC4986328)
Supplement: supp_ddw043_ddw043supp_table2.pdf [file supp_ddw043_ddw043supp_table2.pdf]

**Table S2 Bisulfite sequencing and qPCR primers**

| Gene                                 | Forward primer                                         | Reverse primer                                           | Unconverted sequence                                                                                                                                                                                                                                   |
|--------------------------------------|--------------------------------------------------------|----------------------------------------------------------|--------------------------------------------------------------------------------------------------------------------------------------------------------------------------------------------------------------------------------------------------------|
| BRCA1/NBR2<br>(Bisulfite sequencing) | TACCGT <b>CGACA</b> AGTGGTAAGAG<br>TTAATTTTTTGG        | AGCT <b>GGTACC</b> ACAAAATTCCTCCCT<br>TAAACTTCTC         | AAGTGGTAAGAGCCAATCTTCTTGGCGAAAACCGGGAGAAACGGGACT<br>AGTTACTGTCTTTGTCCGCATGTTAGATTACCCACAGAGATAGCGG<br>CAGAGCTGGCAGCGGACGGTCTTTGCATTGCCCTCCCCAGGGGGCG<br>GGAAGCTGGTAAGGAAGCAGCCTGGGTTAGTAGGGGTGGGGTCACGT<br>CACACTAAGAGGGTTTGAGAGAAGTTCAAGGGAGGAATCCTGC |
| TSPYL5<br>(Bisulfite sequencing)     | TACCGT <b>CGACT</b> TAGAGTAAATT<br>TTTTAGTAAAGGTGTTTA  | AGCT <b>GGTACC</b> AAAATACTACCATTT<br>CATCTCTCC          | CCAGAGCAAATCCCTCAGCAAAGGTGTTCAAAGAGAGACACACGCC<br>CGAGCACTTCTTCATGACAGATGCCACAAGAGATAACTGGAGGAGCT<br>GAAGATGTTTAGTTTAGAAAAACAGGTGATGGGGGACAGGTGGTATGG<br>CTCTTAGCGTTGCCTTGTCAACGAGACCCTGAGAGCACGATGAGCCCG<br>CGCGGAAGAGATGAAATGGCAGCACCCC              |
| PEX10<br>(Bisulfite sequencing)      | TACCGT <b>CGAC</b> CGGGTTGTTGGT<br>TTACGGA             | AGCT <b>GGTACC</b> CCCCGCAAAACCCTCT<br>AACTA             | CGGGTTGCCTGGTCCACGGATGAGGGGTTACGCCAAGGTGCTCAACCC<br>AATCAGAGGGCAGCCTCTGTGTCCAGGAGACACGGGTGCACCCGCGGG<br>GTCAGAACTCAAAGGGGCGGGGGCGCTGGGAGGTTTGGTAGCCAG<br>AGGGCCTGCCGGG                                                                                 |
| BRCA1/NBR2<br>(RT-PCR)               | CTGAAGACTGCTCAGGGCTATC<br>(OriGENE, HP210038)          | AGGGTAGCTGTTAGAAGGCTGG<br>(OriGENE, HP210038)            |                                                                                                                                                                                                                                                        |
| TSPYL5<br>(RT-PCR)                   | GCATGGATACGCTGGAGAACGT<br>(OriGENE, HP216453)          | TTTGGATGAGGTGGTTCCTGCG<br>(OriGENE, HP216453)            |                                                                                                                                                                                                                                                        |
| PEX10<br>(RT-PCR)                    | ACCTGTTCTGCTGGGAGTGAT<br>(OriGENE, HP226364 )          | GTAGTGCCGAAGGTAGATGAGC<br>(OriGENE, HP226364 )           |                                                                                                                                                                                                                                                        |
| ACTB<br>(RT-PCR)                     | GCTCGTCGTCGACAACGGCTC<br>(life Technologies 18080-051) | CAAACATGATCTGGGTCTCTCTC<br>(life Technologies 18080-051) |                                                                                                                                                                                                                                                        |
| TP53<br>(RT-PCR)                     | CCTCAGCATCTTATCCGAGTGG<br>(OriGENE HP200518)           | TGGATGGTGGTACAGTCAGAGC<br>(OriGENE HP200518)             |                                                                                                                                                                                                                                                        |
| APP<br>(RT-PCR)                      | CCTTCTCGTCTGACAAGTGC<br>(OriGENE HP200456)             | GGCAGCAACATGCCGTAGTCAT<br>(OriGENE HP200456)             |                                                                                                                                                                                                                                                        |
| DLG4<br>(RT-PCR)                     | TCCACTCTGACAGTGAGACCGA<br>(OriGENE HP205263)           | CGTCACTGTCTCGTAGCTCAGA<br>(OriGENE HP205263)             |                                                                                                                                                                                                                                                        |
| DNMT3L<br>(RT-PCR)                   | AAGTTCCTGGATGCCCTCTT<br>(Minami K 2010)                | GCCGTACACAAGATCGAAGG<br>(Minami K 2010)                  |                                                                                                                                                                                                                                                        |
| ZsGreen<br>(RT-PCR)                  | CCCCGTGATGAAGAAGATGA                                   | GTCAGCTTGTGCTGGATGAA                                     |                                                                                                                                                                                                                                                        |
| GFP<br>(RT-PCR)                      | GACGACGGCAACTACAAGAC                                   | CTTGTACAGCTCGTCCATGC                                     |                                                                                                                                                                                                                                                        |
