# Supplementary material
Source: PubMed Central journal article supplement (PMC4986328)

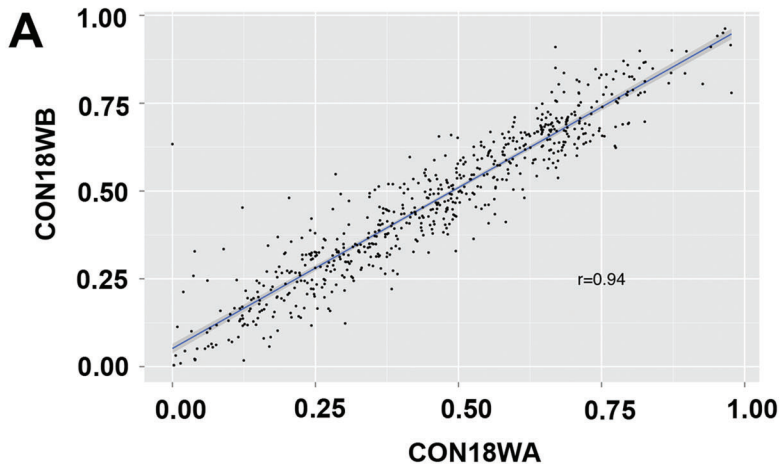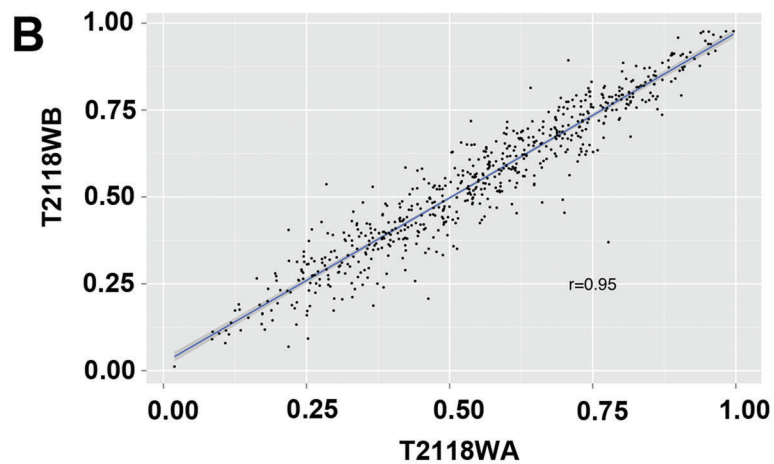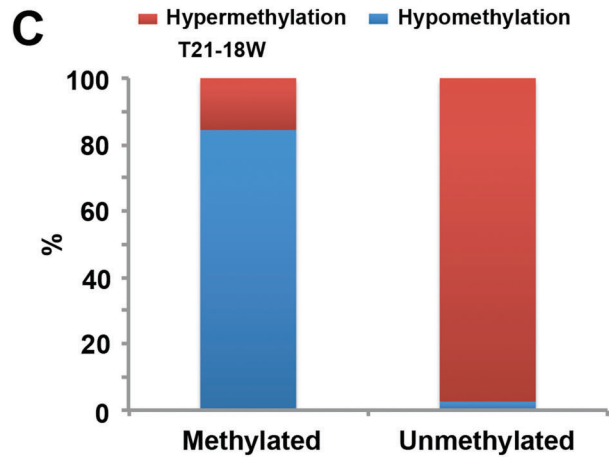

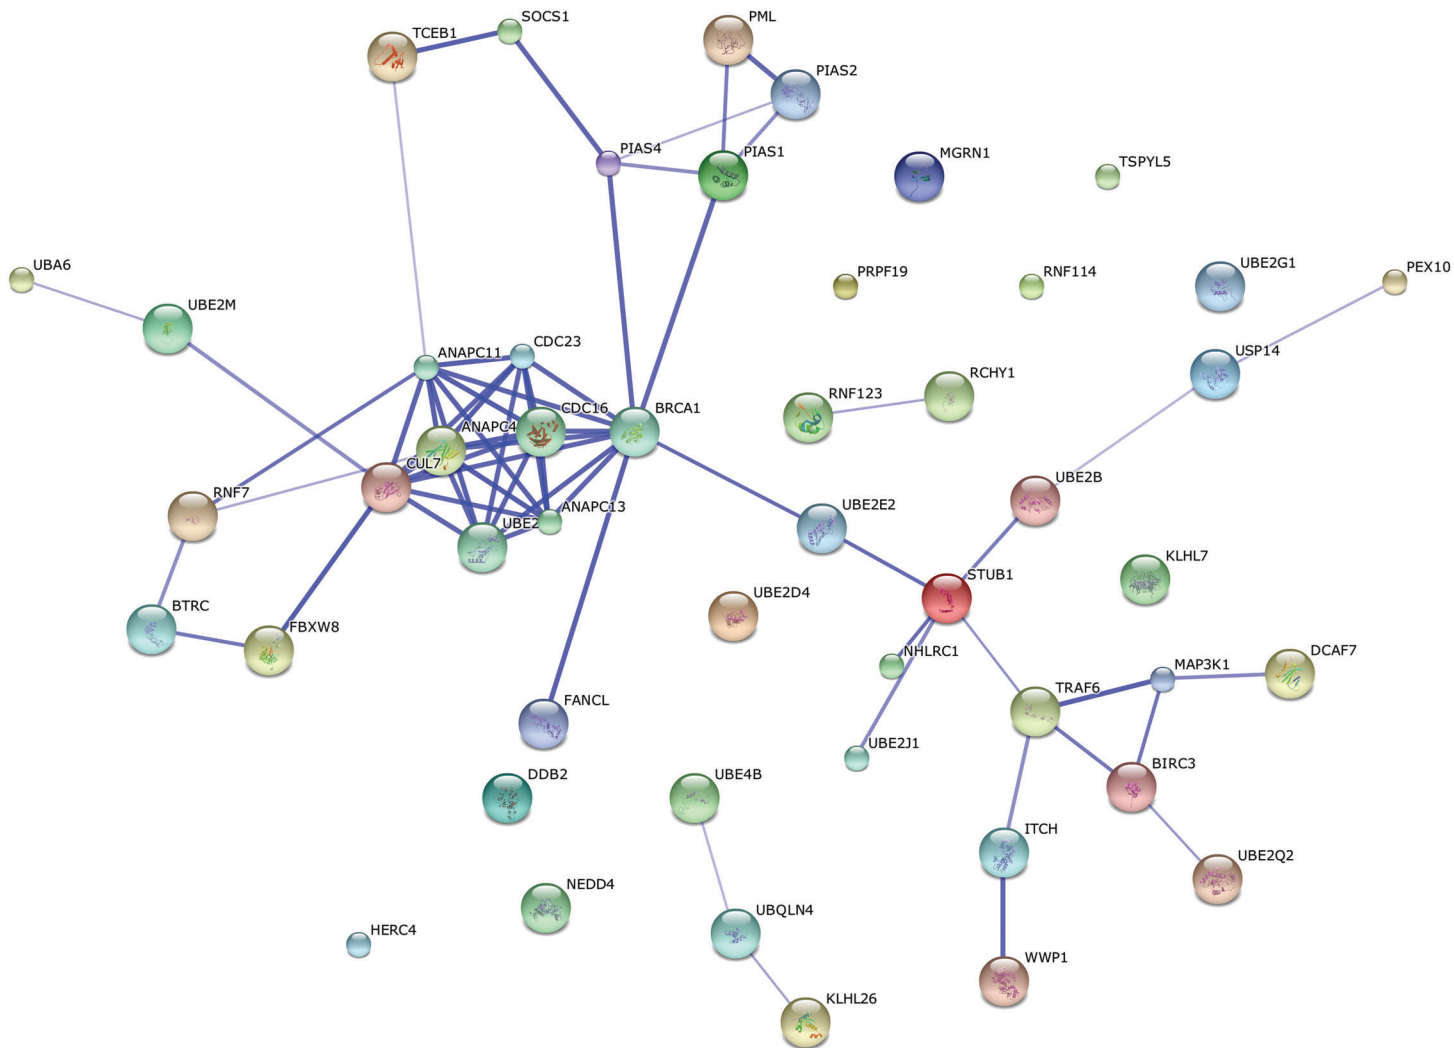

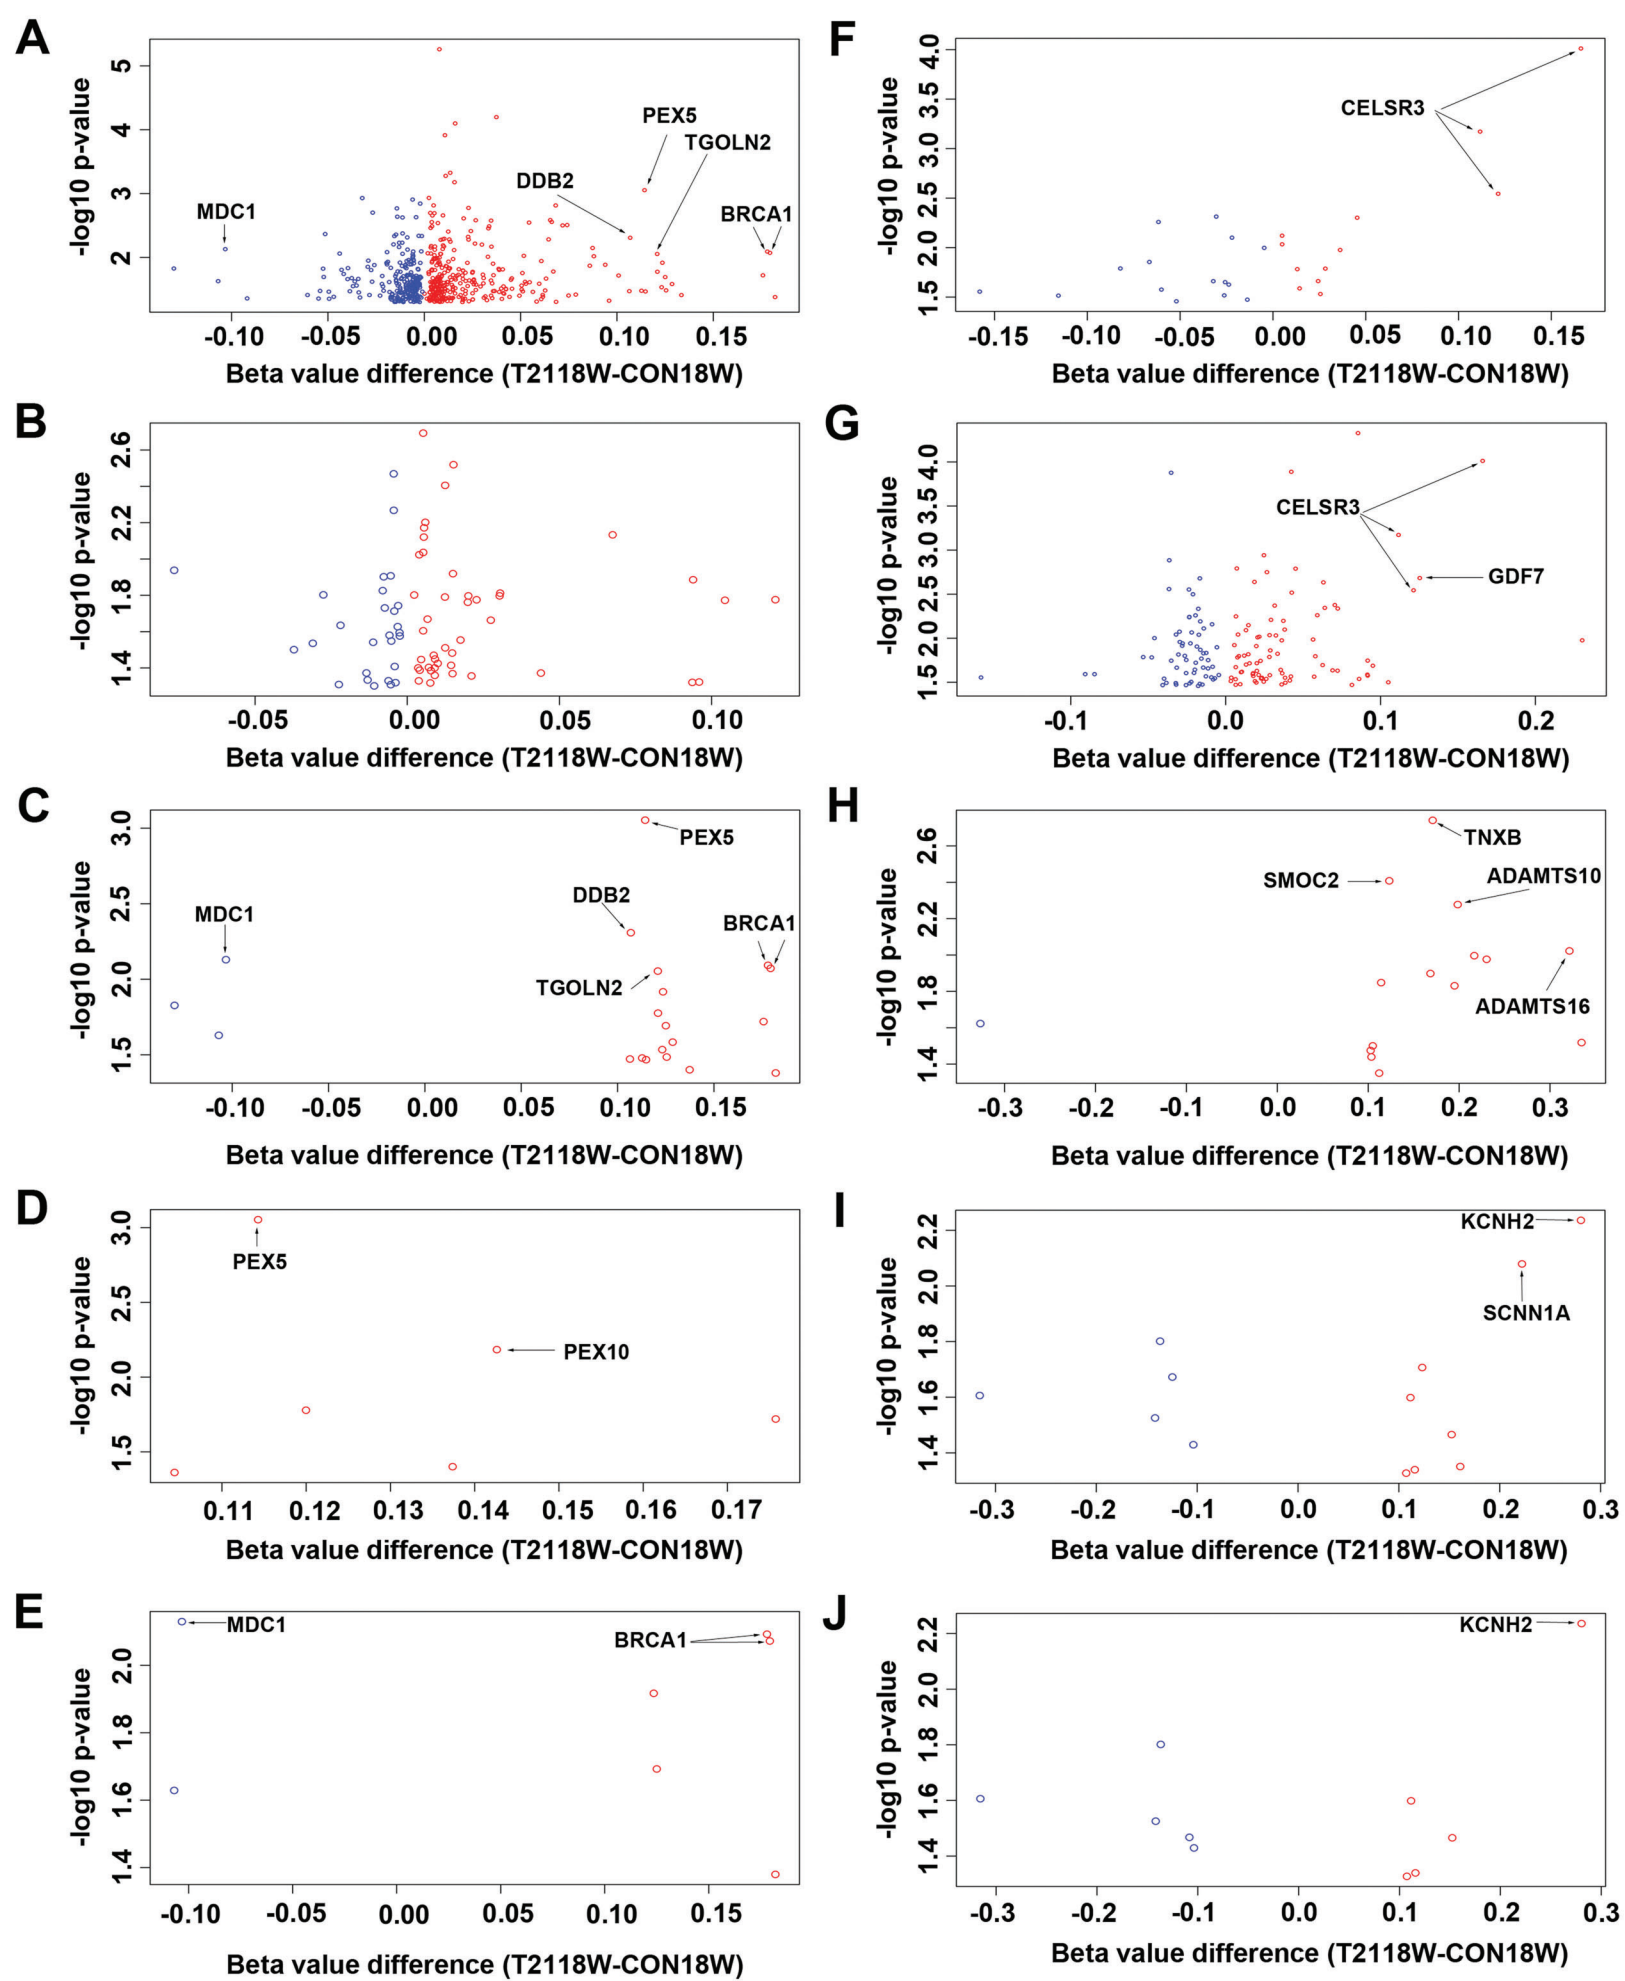

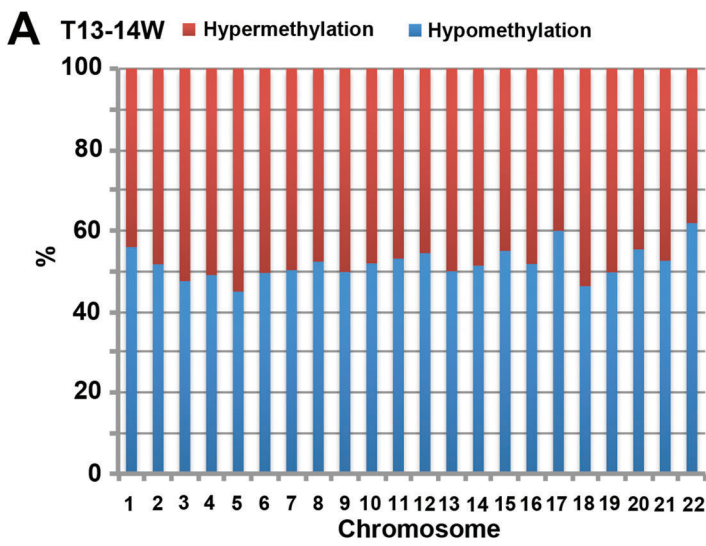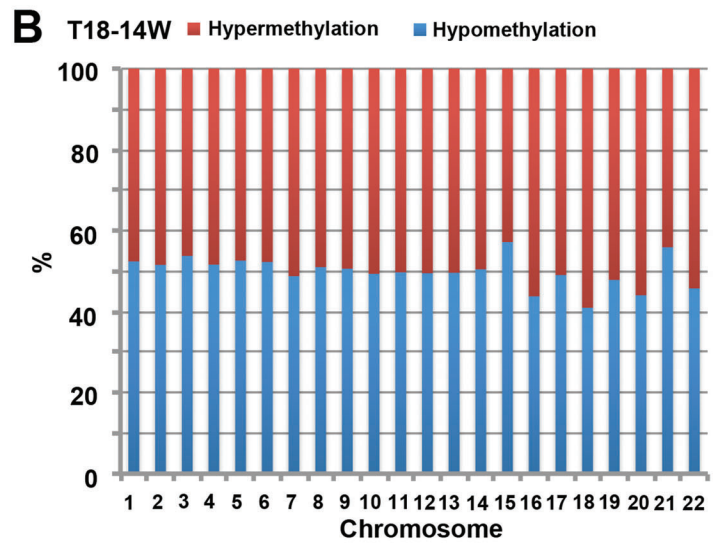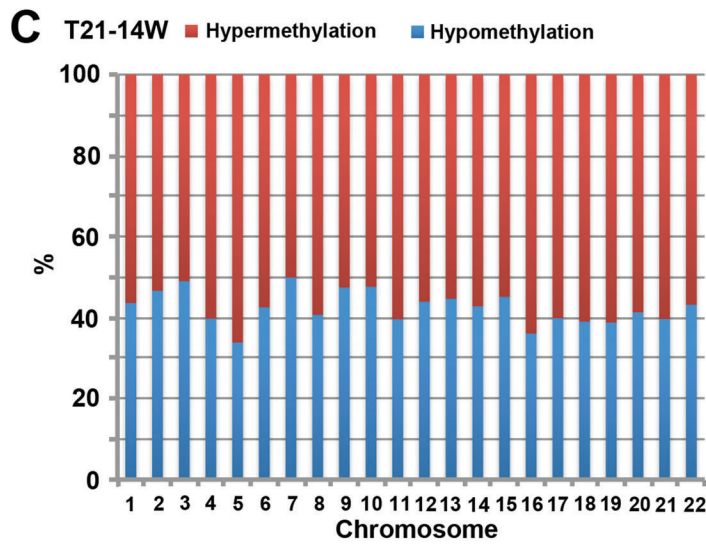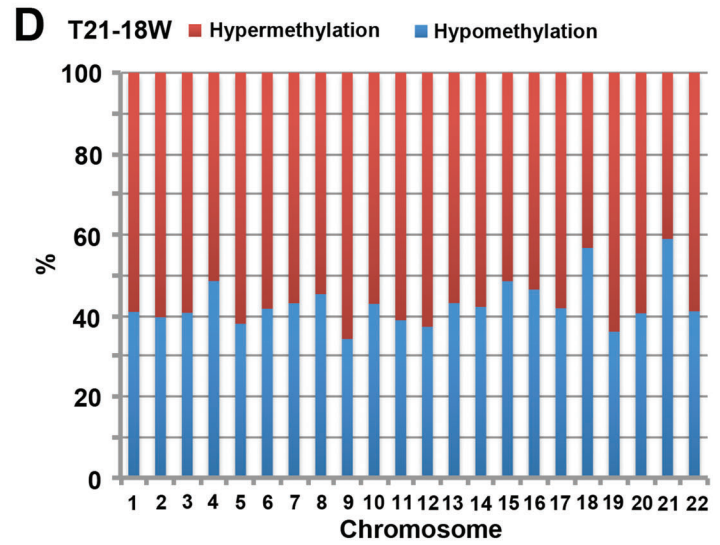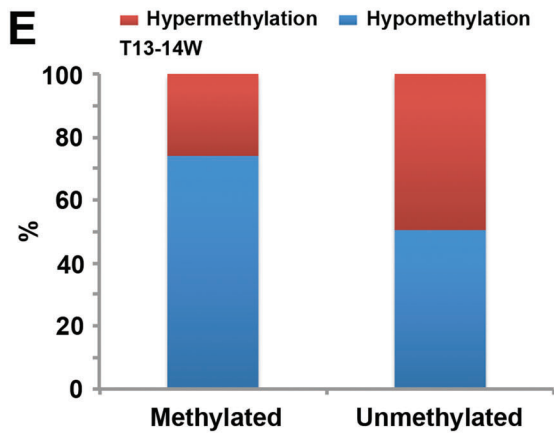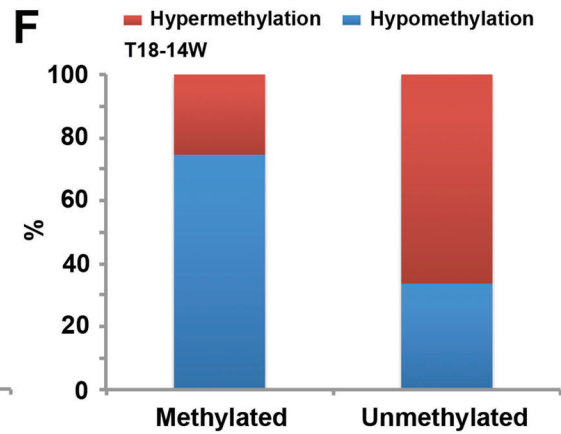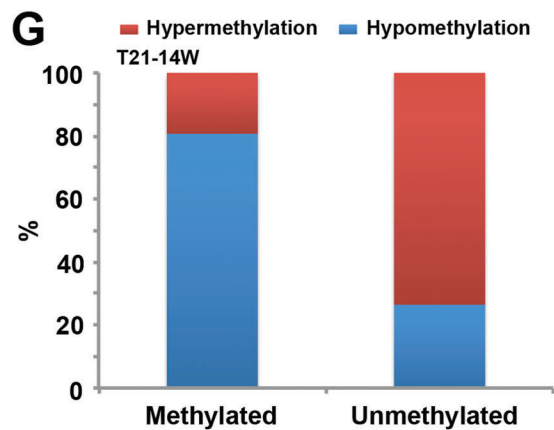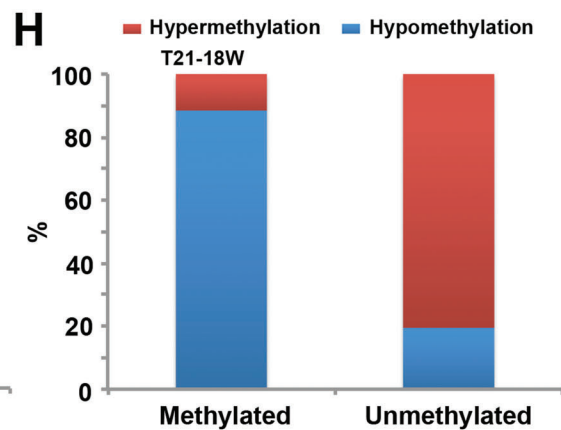

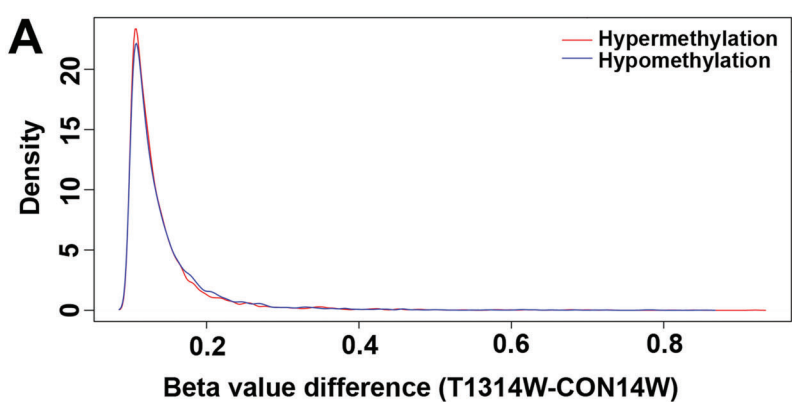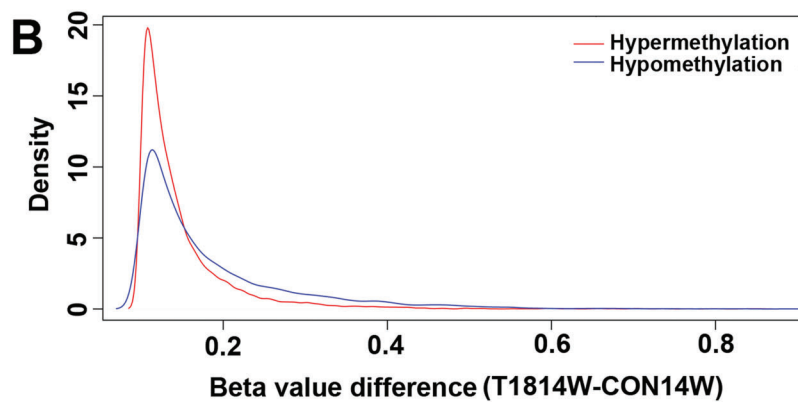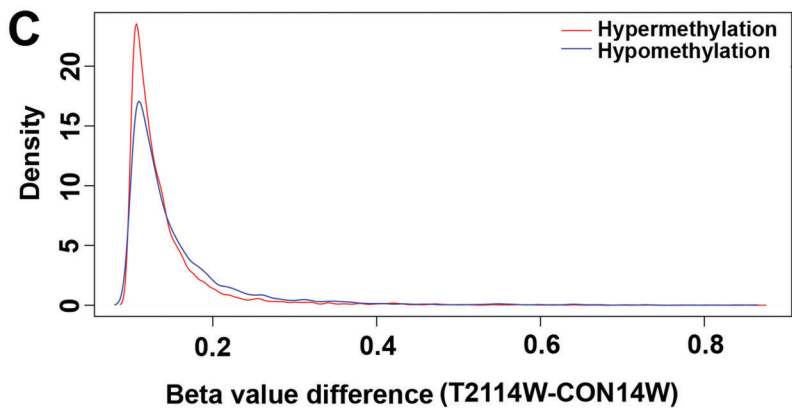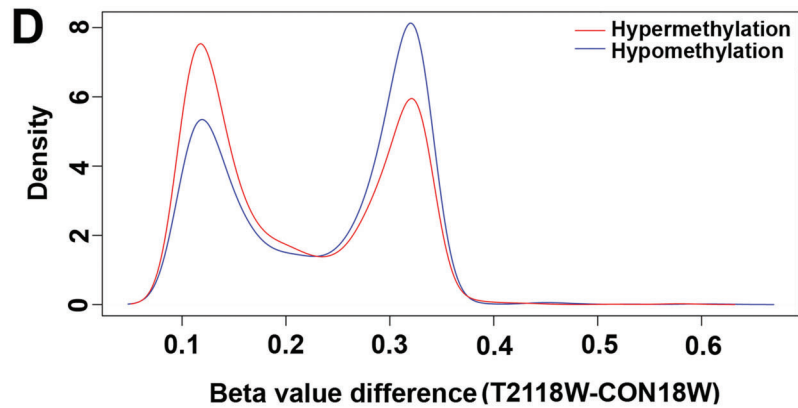

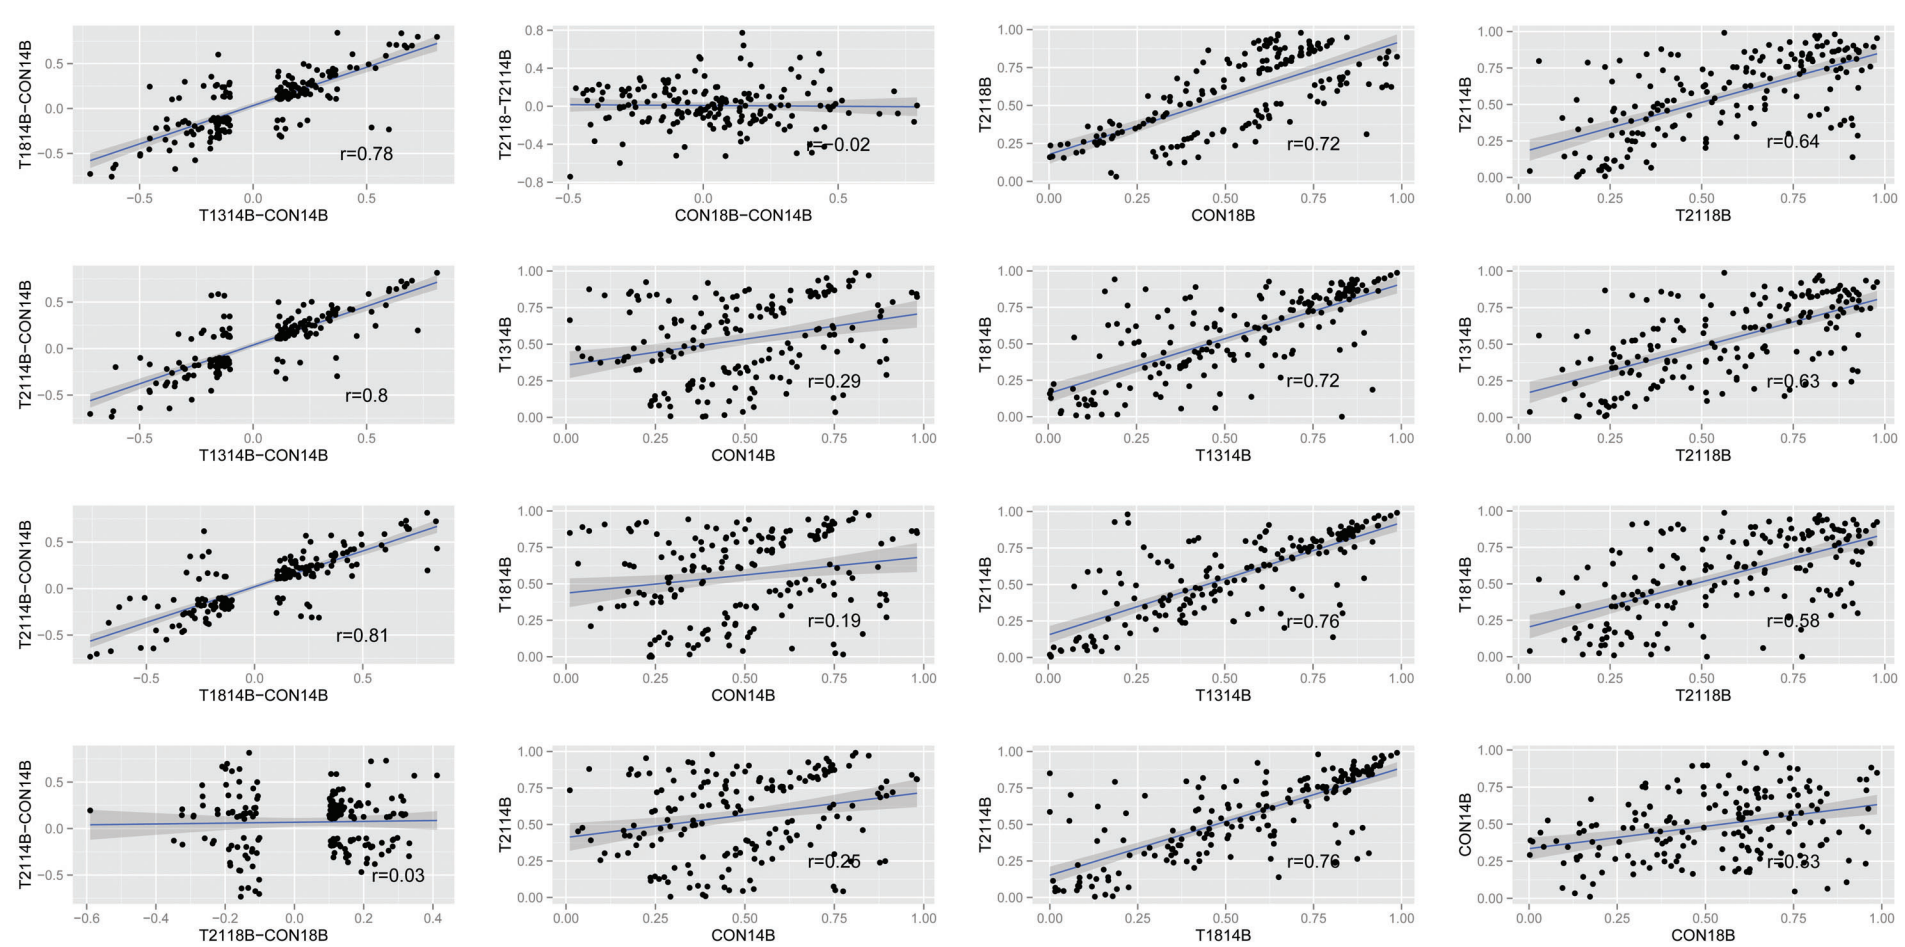

Supplement: supp_ddw043_ddw043supp_figs.pdf [file supp_ddw043_ddw043supp_figs.pdf]
